# Supplementary material for: Impact of non-ideality on reconstructing spatial and temporal variations in aerosol acidity with multiphase buffer theory
Source: Copernicus journal article supplement (doi:10.5194/acp-22-47-2022), 2022-01-03
Supplement: Supplementary file 1 [file acp-22-47-2022-supplement.zip]

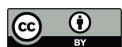

## *Supplement of*

# **Impact of non-ideality on reconstructing spatial and temporal variations in aerosol acidity with multiphase buffer theory**

**Guangjie Zheng et al.**

*Correspondence to:* Yafang Cheng (yafang.cheng@mpic.de)

- acp-22-47-2022-supplement-title-page.pdf
- Data S1
  - Codes\_get\_cni
    - \* AIM\_activity.mat
    - \* AIM\_molality.mat
    - \* ISR\_molality.mat
    - \* get\_cni.m
    - \* readme.txt

The copyright of individual parts of the supplement might differ from the article licence.
